# Supplementary material
Source: Research Square preprint supplement (doi:10.21203/rs.3.rs-9782489/v1)
Supplement: Supplementary file 1 [file 04e961bc7722b2383e5dfc01.docx]

**Table 1** Diameter and thickness of the scaffolds.

| **Sample** | **Diameter (mm)** | **Thickness (mm)** |
| --- | --- | --- |
| **Control** | 9.65b ± 0.49 | 2.40b ± 0.00 |
| **1.5% OKP** | 11.45a ± 0.35 | 3.00ab ± 0.14 |
| **2.5% OKP** | 11.90a ± 0.56 | 3.30a ± 0.14 |
| **3.5% OKP** | 12.25a ± 0.49 | 2.40b ± 0.14 |
| **5% OKP** | 12.50a ± 0.14 | 3.45a ± 0.07 |

Values are expressed as means of triplicate ± standard deviation. Different letters in the same row indicate significant differences (p < 0.05). OKP: Okara powder.

**Table 2.** Porosity of the scaffolds calculated using ImageJ software.

| **Group** | **Porosity** |
| --- | --- |
| Control | 43.07% |
| 1.5% OKP | 15.48% |
| 2.5% OKP | 31.51% |
| 3.5% OKP | 40.70% |
| 5% OKP | 63.00% |

OKP: Okara powder.

**Table 3** Mechanical properties of sodium alginate scaffolds as a function of okara powder (OKP) concentration.

| **Group** | **Shear stress (N)** | **Maximum Compression Force (N)** |
| --- | --- | --- |
| Control | 15.94±1.05a | 0.09±0.004a |
| 1.5% OKP | 13.32±1.32a | 0.097±0.002a |
| 2.5% OKP | 14.00±0.85a | 0.092±0.004a |
| 3.5% OKP | 15.18±0.82a | 0.096±0.006a |
| 5% OKP | 12.73±1.28a | 0.136±0.027a |

Values represent the mean ± standard deviation (n = 3). Different superscript letters in the same column indicate statistically significant differences according to Tukey's test (p < 0.05). OKP: Okara powder.

**Table 4** Quantitative expansion of bovine myoblasts on OKP-functionalized scaffolds.

| **Group** | **48 h (cells/sample) x105** | **7 d (cells/sample) x105** |
| --- | --- | --- |
| **Control** | 1.48aA ± 0.65 | 9.95bA ± 1.98 |
| **2.5% OKP** | 1.05aA ± 0.15 | 9.10bA ± 3.09 |
| **5.0% OKP** | 2.82aB ± 0.33 | 25.7bB ± 5.86 |

Proliferation of bovine myoblasts (1.106seeding density) on alginate-OKP scaffolds. Cell counts were performed in triplicate (n=3) after DAPI staining and trypsinization. Values are expressed as mean ± standard deviation. a, ADifferent lowercase letters in the same row and uppercase letters in the same column indicate significant differences according to Tukey’s test (p < 0.05); OKP: Okara powder.
